# Supplementary material
Source: publisher site journal article supplement (https://www.dovepress.com/article/307763)

**Supplementary materials**

Table S1. Illness Expectation Questionnaire

| Illness Expectation Questionnaire |
| --- |
| In the next three months, I expect that the symptoms of asthma… |
| 1 2 3 4 5 6 7  Will not be there at all Will be there intensively |
| Compared to this period, I expect the symptoms of asthma in the next three months… |
| 1 2 3 4 5 6 7  To improve a lot To get much worst |
| In general, I expect my health to be in the next three months… |
| 1 2 3 4 5 6 7  Excellent Terrible |
| Compared to today, I expect my health in the next three months … |
| 1 2 3 4 5 6 7  To improve a lot To get much worst |
| I expect that in three months the treatment I'm doing will be … |
| 1 2 3 4 5 6 7  Very effective Not effective at all |
| As for the "good days", I expect… |
| 1 2 3 4 5 6 7  To be much more than now To be much less than now |
| In the next three months, I expect the presence of cough... |
| 1 2 3 4 5 6 7  To not be problem at all to be a serious problem |
| In the next three months, I expect the presence of phlegm |
| 1 2 3 4 5 6 7  To not be problem at all to be a serious problem |
| In the next three months, I expect the sense of constriction in the chest… |
| 1 2 3 4 5 6 7  To not be problem at all to be a serious problem |
| In the next three months, I expect the quality of sleep… |
| 1 2 3 4 5 6 7  To not be problem at all to be a serious problem |
| In the next three months, I expect the difficulty in breathing… |
| 1 2 3 4 5 6 7  To not be problem at all to be a serious problem |
| In the next three months, I expect the presence of whistles and hisses in the breath… |
| 1 2 3 4 5 6 7  To not be problem at all to be a serious problem |
| In the next three months, I expect the presence of attacks of breathlessness and wheezing |
| 1 2 3 4 5 6 7  To not be problem at all to be a serious problem |
| In the next three months, I expect the episodes of rhinitis… |
| 1 2 3 4 5 6 7  To not be problem at all to be a serious problem |
| Compared to today, I expect that cough in the next three months… |
| 1 2 3 4 5 6 7  will get much better will get much worst |
| Compared to today, I expect that in the next three months the phlegm… |
| 1 2 3 4 5 6 7  will get much better will get much worst |
| Compared to today, I expect that in the next three months the sense of constriction in the chest… |
| 1 2 3 4 5 6 7  will get much better will get much worst |
| Compared to today, I expect that in the next three months the quality of sleep… |
| 1 2 3 4 5 6 7  will get much better will get much worst |
| Compared to today, I expect that in the next three months the difficulty in breathing… |
| 1 2 3 4 5 6 7  will get much better will get much worst |
| Compared to today, I expect that in the next three months the presence of whistles and hisses in my breath… |
| 1 2 3 4 5 6 7  will get much better will get much worst |
| Compared to today, I expect the presence of attacks of breathlessness and wheezing in the next three months… |
| 1 2 3 4 5 6 7  will get much better will get much worst |
| Compared to today, I expect the episodes of rhinitis in the next three months… |
| 1 2 3 4 5 6 7  will get much better will get much worst |
| In general, I change my mind easily |
| 1 2 3 4 5 6 7  Complete agreement Complete disagreement |
| How sure I am of the answers I gave in the previous answers? |
| 1 2 3 4 5 6 7  Not at all Very much |
| If I had to bet money on the fact that my predictions will come true, I would bet… |
| 1 2 3 4 5 6 7  Nothing or so A lot of money |

Figure S1. Grouped scatterplot of Rigidity by Absolute Expectations (AE), divided between neutral or positive expectations (AE≤3) and negative expectations (AE>3).


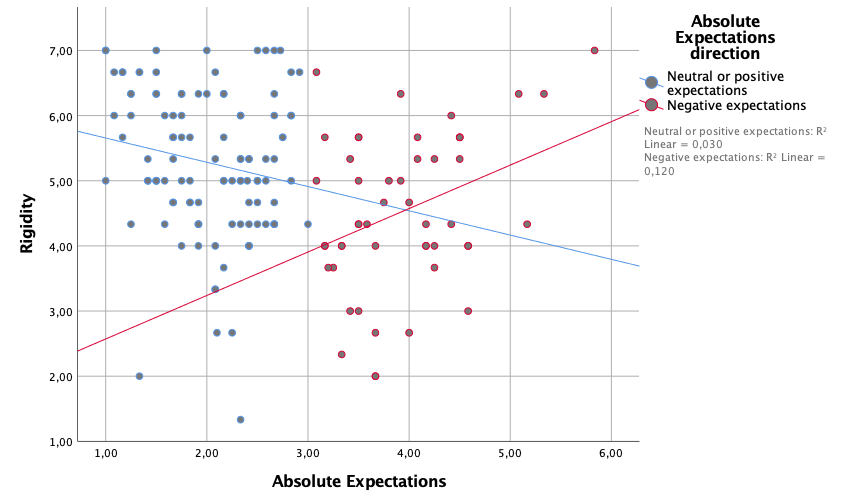

Supplement: Supplementary file 1 [file get_supplementary_file.php]
